# Supplementary material
Source: Springer Nature journal article supplement (https://www.springermedizin.de/resource/supplementary/12958_2003_112_MOESM4_ESM.pdf/9566146)

**A**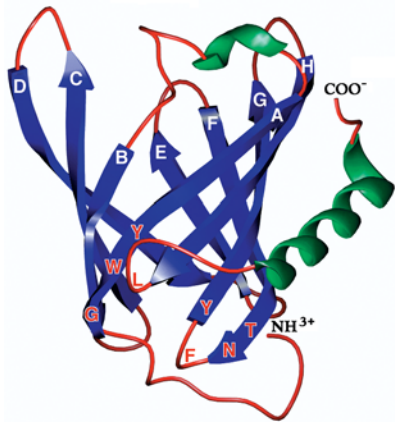**B**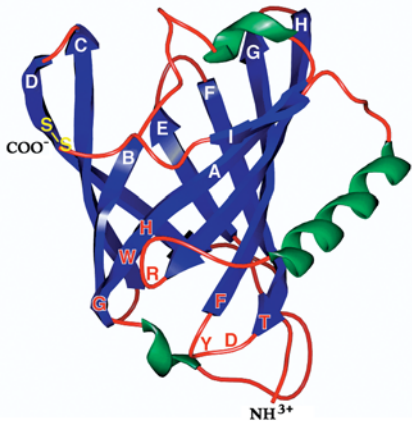

Supplement: MOESM4 [file 9566146]
